# Supplementary material for: International Prognostic Index-Based Immune Prognostic Model for Diffuse Large B-Cell Lymphoma
Source: Front Immunol. 2021 Oct 22;12:732006. doi: 10.3389/fimmu.2021.732006 (PMC8569825; doi:10.3389/fimmu.2021.732006)
Supplement: Supplementary Table 2 — Immunologic signature gene sets. [file DataSheet_2.xlsx]

## Sheet: Sheet1
Gene Symbol		Combined from:
RFLNB		1. ImmuneSigDB (www.gsea-msigdb.org/gsea/msigdb; www.immunespace.org)
HOPX		2. Immport (www.immport.org/shared/genelists)
EML5
BCL2A1
MFHAS1
TSPAN31
BTF3
IL7R
GZMB
NSG2
ANXA1
MOGS
ETS2
NCAPH
ADCY6
CDKN3
TDRP
CERT1
JHY
GPHN
ATP5MC2
RAB12
STMN1
PDE7A
SAR1B
URM1
PTGER4
C8orf33
GAPVD1
TMEM69
FAM184A
ZBTB4
FABP5
SUGT1
MFF
LINC00623
STAP1
TRAT1
LY86
VEGFB
HTRA1
CHST7
BTK
IL2RB
COQ2
PRPS1
MAPKAPK3
FAH
REC8
OXT
VAMP5
TNMD
FAM168A
UHMK1
PANX3
SMAP1
CYLC2
SFMBT2
MYL6
DACT1
RHOU
SCML4
ZNF2
CNKSR2
CD59
CTSZ
RAB43
JUP
NPAS2
FAS
BMP2K
SIGIRR
CCL17
ZNF224
NRIP3
CDK2AP2
TMC4
TMEM165
USP48
TXNDC9
GEM
KNG1
BDH2
GLA
AL845331.2
SDS
TSC22D1
REEP5
TMEM25
GK5
UBALD2
ZNF646
TSNAX
EXOC7
CANX
FHDC1
CBFA2T3
NELFA
ARV1
NABP1
GNAS
FAM156A
TP53I13
BUB1B
SPCS1
MCM2
RNF44
FGF20
POLK
CCDC14
MYH9
CCNG2
RC3H1
DENND1B
BICDL1
CDK4
TATDN2
SLC39A14
USPL1
ADA
TRIM22
RSRC2
TNFRSF10D
OAS2
PFAS
PSME2
CD22
FEM1B
MDH1
VPS13C
EXO1
CYP3A4
SEC62
MYO1D
ANXA2
FEN1
SYK
ARMH3
ARHGAP30
STAM2
SIVA1
RABGAP1L
AGO1
RNASE10
SESN3
MAMDC2
SLC26A11
PEX11A
NME4
CCN3
RAD54L2
SEMA3G
AR
IER3
ART1
VDAC1
NPAP1
SCN5A
GIT2
PDE5A
MORC1
ZNF91
UCHL1
BAZ2B
PIGZ
IGLL3P
KLF4
RTN1
PDIA4
CD52
AKAP1
RFTN1
NGDN
PSMA2
PMAIP1
GLG1
FKBP5
AASDHPPT
SPTBN1
ATP5PB
IL15RA
CRKL
RIBC2
ERLEC1P1
SIGLEC1
ITGAE
XAF1
ZNF746
PMS2P11
ZNF491
IFI44L
MRGPRX4
PARP9
ULK1
MRPL51
EME1
USP18
EPSTI1
HERC6
PRR36
WNT5A
KLK6
RAB30
LCORL
MTUS2
AGAP1
FCMR
UNKL
STAM
KLRK1
PDE4B
YES1
GUK1
PJA1
RPS11
DDX46
DNAJC19
PHKA2
C7orf50
TERF2
LY6K
TSEN2
MX2
C15orf61
KMO
TUFM
MIER1
MEGF9
ADAM19
RRM2B
ZSCAN16
PTPRO
SOAT1
SACS
RAMP1
DDIAS
PRXL2B
SURF1
IDH2
RAD17
C6orf132
HS6ST1
GRAMD1C
DUSP1
TFCP2
NDUFA13
MTARC2
MAPK14
HDAC1
PRSS23
HSD17B14
GPATCH2
ENTPD5
ECSIT
PPP3CC
IDS
MTSS1
MIGA1
EARS2
FAM217B
PTK2
EIF3E
CBX4
KCNJ2
ARHGAP26
NMI
SLC7A8
ADSS2
C1R
GADD45B
APOL3
CGGBP1
RAB40AL
CXCR5
CRTAC1
SNRK
NDUFS2
DENND1C
APOBEC3B
BTBD2
ANP32B
SH2B3
GM2A
BCL2L1
CD53
MCEE
INPP4A
CTNNA3
NR1H2
DNAJB6
PTPN12
TOR1B
DIP2C
STAG3
LCP2
CYBA
SS18
TSPAN9
TMSB10
UBA2
PHF20
EFCAB11
GIMAP6
PRR14
DPY19L1
NREP
ZNF692
SSX2IP
ARHGEF10
CEP104
GLIPR1
SAP30
HNRNPA1
SOS2
SLC43A1
JADE3
UBE2U
ATP4B
FANCL
PHF23
NDEL1
TMX2
HNRNPLL
TRIM65
MAP4K3
FAHD1
GTPBP6
GPR180
DEDD
BTBD3
PLTP
HMOX1
ZC3H4
KLF9
EXOSC9
DAPK3
TRIP10
TPGS1
POLR1C
RITA1
PHGDH
IRAG2
SNORA71B
GAS6
ACAT2
IL13RA2
XKR8
TYSND1
MPV17L
SPATA7
ABHD1
LINC00310
HTR5A
SMC1A
INHBE
TMBIM1
RGS17
ABCC8
LMNTD2-AS1
HEPACAM
CHRNA3
PAG1
ABHD12
PDCD4
MESD
CLEC2L
NUSAP1
METTL22
SKA3
SLC20A1
RAB38
AKIRIN2
WNT7B
RIOX2
RCC1
FGD3
ADGRL1
NUP62
ZYG11B
PSAP
SF3A1
IL3RA
SPPL2B
MEST
CMPK2
XCL1
ACE
CCDC6
ACVRL1
APBA2
ACO1
ZNF638
SLFN12L
TMEM159
NRP1
RSAD2
S100A6
ANKRD10
ANKZF1
ATN1
ADAMDEC1
MRPL45
RHOC
PTPRK
PBX3
UTP3
TBL1X
PINK1
TLR2
CSK
SPOPL
NBN
SCYL1
KLRG1
FLI1
ADM
ADAM8
ACP5
LGALSL
ABCB7
TMEM39A
CAPZA2
CCNL1
TPK1
ST3GAL1
TGFBI
DUSP16
CCNE1
ANKMY2
TCTE1
HAUS4
ATP6V1E1
ELMO2
ABHD10
ZSCAN21
PRXL2A
ELOC
MRAS
GSR
BICD2
SERTAD1
SUPT5H
BCKDHB
GNPNAT1
RGL1
POLG
IRS1
FAM111A
MSLN
SAE1
GPR137B
ZBTB33
LPAR2
ACADVL
STARD4
ACBD6
NAMPT
HPCAL1
TMEM14C
GSTK1
REPS1
UHRF1BP1
TM9SF3
SLC4A1AP
SMARCA4
SMOX
CCDC167
RPS6KB2
PIK3C2A
IGFBP2
CACNG6
UBA1
ACAA1
RBM5
ANKRD26
FOXP3
PPP2R3A
TM9SF1
FLT1
TBK1
NSMCE2
ACAD10
GPR182
DLD
NUDT16
LTV1
GNE
NUP88
SYNPO2
FAM149B1
NSMF
MECR
RNF34
CDC16
ZFP36L2
KDR
LCE3B
HCLS1
IL12A
SEZ6L2
IL17RA
SKIV2L
SIRT7
PCBD1
RTN4R
ING2
AKR1B15
CD300A
WNK4
TMUB2
SERF2
PROKR1
SSBP4
CAMSAP1
NCMAP
SLURP1
N4BP3
C8orf82
CDC42SE1
CCL24
SNX18
GFRA2
PC
GHITM
NAB2
TIMP4
GDI1
MET
CHDH
IGDCC4
PITPNB
IKBKB
DCBLD2
CTDP1
PTCH2
CEP20
ORM1
UTRN
MRPL54
PDE8A
CCL2
CASR
DOCK6
CXCL3
TMEM79
ARHGDIB
IFIT2
HNRNPM
SARNP
NCK2
CD274
CBY2
PSIP1
CALR
TMEM128
ELAC2
HIVEP1
NPRL3
CPEB2
STAG2
IER5
ZYX
GPR12
CALCRL
HSPB2
DHRS3
GLTP
COCH
PJA2
ZDHHC3
CD72
GABARAPL2
CHST15
MAPK9
RRN3
SBDS
TXNDC12
HSD17B4
MOB3B
COL4A5
SMC4
SLC44A1
PFN1
TEAD2
PFKFB3
PTCD2
PLCL2
RTL8C
SERTAD3
E2F6
RAP1B
IGFBP1
BST1
IMPDH1
C9orf64
HSPA5
DAPP1
NUDCD2
ATP11B
RNF214
MAN1A2
SLCO3A1
RPL19
UNK
ACACA
NUDT19
ROCK2
TAS2R1
TRIM7
CAMKK1
SIL1
LMAN2
ATP5IF1
EIF2S3
KLF6
PCNX3
NRDE2
NUDCD1
AP3M2
BRDT
NEK9
SPAG5
GNG2
CCDC137
ASH2L
SMPD5
LYZL4
PREB
AQP2
C18orf32
CHD4
BBS2
KCTD1
NFKBIB
UBE2C
RGS9
MRPS36
DMAC1
FGF3
RPL31
PHYHD1
PSME1
HOXB9
ITGA4
NIT1
NDP
CAPZA1
SLC6A20
CLCC1
HINT2
ERGIC2
ST6GALNAC4
RCL1
TIMP2
IL1RAP
DNAJC5
ENPP2
UCN
BACH2
MYCBP2
SLFN13
ZNF706
CHM
OSGEP
HLX
ZDHHC5
FOS
SLC35F6
UBR1
YBX3
EEF1AKMT1
SLC41A1
ATP1A3
ARL14EP
PNPO
PGAM2
ANAPC13
ARHGAP5
MINK1
PTPN14
SUSD4
PAF1
RGS2
ALG13
ZDHHC11
PKNOX1
G0S2
POLD2
HEBP2
TP53BP1
DPEP2
FAR2
SNX29
CENPF
ANKRD36C
HPRT1
LGI1
BTG2
ASB16-AS1
ZNF436
SPO11
KCTD12
KIFC2
ITGB1BP1
BIN2
ZNF709
PTPRJ
ANKS1A
ARRDC3
VRK1
LCOR
SLC29A1
ASAH1
PTPN22
PCIF1
EPB41L3
AMIGO2
ID3
GPR157
DPH3P1
SNHG16
CD8A
EPAS1
CD28
NEK6
GCSAM
ELAPOR2
SOCS2
ETFB
WDR82
ZNF791
EBI3
SCYL2
LMNB2
CLDN1
GNPAT
TMEM243
FUCA2
MTMR6
FKRP
LHFPL4
CSNK1A1
RUNDC1
SCN11A
KBTBD7
ZBTB43
CCDC51
DIPK1B
ZNF319
HELZ2
NUDT6
C12orf29
KLF3
MAML2
PXMP4
LTA
DCAF4
GAS1
ATG4A
PARD3
RNASEL
LINC01553
ZNF471
ZNF304
SURF6
MCUB
NDUFA5
FOSL1
ATP13A5
CD84
LEP
TGFB1
GRAMD2B
MIEF2
KRT75
PGM2
MANF
ANXA5
TMEM42
LRGUK
TDP2
CDC25C
STX11
PIK3AP1
DCAF8
SNAI2
C2orf49
MCOLN3
IGKC
PIGN
STON1
C11orf65
LMAN1L
MAGEH1
CFAP157
CHSY1
SYTL2
IKZF4
IL2
ST13
LIMD1
NPNT
DCTN1
PPP3R1
ELN
CACYBP
NAF1
RPL6
TOP1
RMND5B
SLC10A6
ELF5
DDIT3
KCNH3
ABHD17C
RAD51AP1
GOT1
SELL
TXN2
NONO
MSX2
KAT7
RNF181
ADPRHL1
NEK7
CADM4
HAUS2
AHR
IER2
EED
LARS1
TPM4
LDHB
KIR2DL4
PARP16
DSTNP2
CD5
BCL2L2
OSBP2
INPP1
ITM2A
FAM30A
LIME1
SLC15A3
ZAP70
ZNF532
TCL1A
DAAM1
IL4R
ZBTB32
EIF2B3
OBI1
FNDC3B
ENTPD1
C2CD3
RPAIN
CORO1A
MACROD1
PKIG
CTBS
USP25
PPY
RPS4X
ATOX1
SIK3
MYL6B
CRLF2
DPY19L4
NECAB2
MTHFD2
FGL1
EIF3M
SLCO2B1
SRSF7
IL1B
RPL21
TST
DOCK9
KCNMB1
RPL11
MIR22HG
RHOG
RRAS2
CTBP2
LRIG1
SERHL2
TPT1P8
M6PR
FCER1G
GATA3
VAMP8
UBASH3A
CSTA
CD93
ERCC1
LAMA5
MAPKAPK5-AS1
IMPA2
AP4S1
ELOVL6
TTC9
GOLT1B
NIPAL3
ITPR1
PXN
HYI
MCM4
DCLRE1A
TNFSF10
DKC1
SMIM7
ANKH
ITGB2
GRAP2
SASH1
AXL
TAL1
EPB41L4A
ABCA1
RAG1
HLA-DOB
DDAH2
STT3B
OTULINL
RGCC
GYS1
CRIM1
RGS18
PHYH
DUSP22
GTF2H2
YPEL3
ID2
NLGN2
FAM118B
HKDC1
RAD50
TOB1
KNTC1
SMURF2
NME1
ZNF510
CASP9
BUB3
P2RX4
GRAMD1B
OCM2
RRM2
ALOX5
TXNDC15
FGL2
CCR5
IRF7
KIF22
HOMER1
WRAP53
CLIP4
IRF4
MYD88
SPRED2
LCT
ACAT1
CKAP4
C19orf53
PDE4DIP
CYBB
KCNA3
LINC00487
SLC46A1
GZF1
FAM91A1
ASB13
DSC1
RAP1GAP2
ZNF496
EOMES
INMT
LYN
RPL24
FPR3
RNF19B
EVI2B
HAGHL
ITCH
LACTBL1
PSD2
SLC8B1
NECTIN3
LINC01098
ASIC4
BTBD7
FAM236A
DNAJA2
PASD1
KLHL3
TRIM36
PTHLH
PARG
PIK3R5
LILRA5
ZNF7
EFNA1
METTL7A
SERPINA1
IL10RA
TBC1D22A
CACNG1
DDX60
PXYLP1
FHL3
TSPEAR
CCR1
POPDC2
C1orf56
CHEK1
POLR2E
EXT1
SAMD9L
SLC46A3
KIAA0040
NNT
FPR2
POLR1H
FASTKD5
ABCD3
HIGD2A
LRRC8D
TTLL11
COQ4
TOMM7
PAQR8
SBNO1
LAPTM5
SIGMAR1
MMRN2
RCC1L
RRAD
JPH4
CCDC181
USP12
DBI
SMPD4
MYBPC1
CITED4
RPS6KA3
TLCD1
MDC1
SUSD6
NSDHL
RAB39A
CEACAM20
SCLY
ITPK1
STEAP2
GLRX
SF3A3
IPO5
MAP7D1
BMPR2
CAPSL
NOB1
GOLGA7
DDI2
FHL5
BCLAF1
TMOD2
RAB3IP
CREG2
PSMD12
BATF2
USP38
TMEM30A
PRR18
TNFRSF1A
EMC2
TSKU
SHMT1
ACVR1B
DUS3L
ITGB5
PRKAR2A
PPHLN1
ZC2HC1A
CCDC189
S1PR1
TAF4B
SNED1
CABLES2
DRG1
UROC1
KIAA0753
JUNB
NUP155
LAMA2
CCNF
PCOLCE
GYG1
ARFIP1
TMEM86B
ROCK1
ZNF703
SMIM30
ATP1B3
PRDX3
C3
CDC40
BFSP2
NXNL1
ASIC5
GABRB1
GUSBP11
PKHD1
TNFAIP6
LCN12
MGAM
ZNF781
LIFR
ZBTB8A
SERPING1
SAMD15
DCP1A
NDUFB4
PARGP1
TTC29
IGLJ3
GMFG
PAX5
PHEX
SWAP70
TUBA1B
PELI1
NGLY1
PDLIM1
SLC7A5
DAPK1
SLC2A3
MAP2K6
SCAMP5
CD14
MAP4K1
TCF4
ATP1B1
PGPEP1
FBXO22
DIXDC1
UNC119B
DIRAS2
WASHC4
TXNL4B
NRDC
PSMG2
EXOG
ZNF124
PPP2CA
SFRP4
NAALAD2
HBEGF
SYNRG
OR2C1
ORC3
CALML5
TNPO2
TBRG4
FBXL8
CPSF6
KIF5C
H1-4
GLUD1
RIPOR1
SUGP1
KLHL28
TSPAN12
RETSAT
AGPAT4
GUCD1
RBP7
C1QTNF12
SMPDL3A
SLC12A5
JMJD4
CDH1
FCGR2B
TCF7
SMAD3
MMD
VSIR
EZH2
IQGAP2
EP300
SLC35E3
CAMK1D
DHDDS
LFNG
PGLS
SNHG6
RRM1
EFEMP2
LNX2
MCTP2
ARMCX4
ISCA2
SPC24
KCNC2
CCDC175
C15orf62
DUT
HAAO
VPS4A
THUMPD1
COG4
CDC14B
DMRTC2
DMKN
ACVR1
N4BP2L1
GGA2
PSMB10
SNX5
IFT27
IFI30
PLD1
F2R
EXOSC3
CLPTM1
MFSD14A
HLA-G
CAPRIN2
VCP
ZBTB12
FRAT1
TAP1
PKN2
ACAA2
TSSC4
LPIN2
HMBOX1
NPY2R
FBXL3
FCER1A
S100A8
CD1C
IFI27
RAB9BP1
ATP6V0D2
DIAPH1
FCGR2A
UBN1
HSD11B1
RNASE6
MPZL1
ENSA
UGCG
CETN3
TP53
NCALD
TXLNA
LEPROTL1
CTNNB1
TECR
DTNB
CLTA
PFKFB1
FAM168B
FAT2
GSK3A
PCDHGA8
CH25H
KLF10
TMEM94
SKAP1
DHRS2
APOC1
POLR3C
MYDGF
HMGN2
PMM1
NDRG1
GUCA1A
LSR
TMPRSS15
ALDH3B2
CTSL
USF2
LY75
BTD
COIL
GABRR2
RRAGB
PRPH
AQP3
CCR7
PKD1
CDK2AP1
PBX1
DIPK1A
TRAF1
LRP1
NFIC
CACNA1D
MORF4L2
CHN2
SRSF3
TPM1
NCBP1
CPVL
RNF103
TEX30
NUDT1
MIA2
PRDX2
SUN1
HNRNPR
H2BC7
CHAF1A
TAZ
ALPI
TNFRSF9
BAHD1
CPM
IQSEC2
GPC3
TXNIP
BBS9
TLE4
DHX38
SLC4A7
LSG1
CARM1
LAMA1
PLCL1
TTK
CWC15
CSRP3
SLF2
FGF23
FAM227B
MEAK7
RASL11B
ITM2B
SERINC5
CENPM
LINC01260
TUBG1
RPS27
SLCO4A1
FAM13A
CSTF2
CENPU
CPT1A
ZIC3
ALPK3
SPARC
NPEPPSP1
PODXL
TMEM196
MGAT5B
CHMP1B
DDX41
UCP2
PDXK
KLF13
MAPK1IP1L
CDIN1
TMEM251
FCGR3B
TGIF2
GAA
ATP13A3
MPRIP
CXorf38
DIABLO
IL18BP
STK38
CLCN7
POLB
HCG4B
PBXIP1
ZC3H15
UBR7
MMP1
PECR
TP53I11
IPCEF1
RALA
TRMO
CHN1
HOXA1
RGS16
ATXN10
AFF2
C10orf88
MPP2
SDHAF1
BSCL2
CLBA1
NDUFA9
KRTAP1-1
VPS37B
H3C12
ZNF473
CCNT2
ACACB
RPS16
PIK3CB
BLMH
DUS2
TXNRD1
LMNB1
RHEB
PLA2G4A
RARS1
FMO1
ZFR2
RAB36
TASOR2
FBP1
P2RY10
SOX4
USP20
RHOBTB3
ABCG2
ZDHHC7
BIRC5
RANGRF
AP2B1
ZEB1
CD36
SYNE1
MATK
RIOK3
PRDX6
HSPA1L
AIMP2
URI1
NANS
STK32B
CTNS
RAN
CTSH
ZC3H14
SPATA1
ANXA9
LAS1L
RBP4
TRAPPC2
NFE2
ERP44
TRPC1
NACC2
HLA-B
ENG
PRC1
RENBP
CNN2
UNC5B
REXO2
SGK2
R3HDM1
SMIM27
RRP12
MT2A
COQ6
TNFSF11
FBXO41
CLIC4
TRIAP1
RPS17P5
NASP
LYZL6
ZBED8
KLK3
KCNB1
CPN2
VWA8
PLEKHG6
AKAP17A
ORMDL2
ECE1
CASQ1
LAT2
GHSR
ACTN2
LBHD1
IL11RA
PTTG1
EFCAB14
SLAMF1
ATP11C
PLAC8
MTRR
MROH1
MSH3
CDIPT
ZNF280B
COPA
SMARCAD1
ARL4C
FBXO2
CIAO2B
SCAF8
RILPL1
MANBAL
CDR2
NXPH1
PYCR2
P4HTM
LY6E
ZBTB40
CORO1B
BCL11A
LGALS3
HS3ST1
DEFA1
SPATS2L
QARS1
IFI16
BNIP3L
EIF3L
RLN2
MAN2A2
RAD1
NXT2
GSN
GPI
CLIC3
ABCC2
GTF2I
FBXO32
CST9L
CORO2A
SUN2
GPR160
SLC9A5
ALKBH3
ALDH18A1
ZFYVE21
LYST
NIN
F2RL2
CEP164
SMYD3
DNAJA4
TCF20
SUSD3
MYO10
GABRG3
REN
GCM2
RUNX3
KHK
AK4
AADAC
TATDN1
ANK1
MAGOHB
CRACDL
EGR2
IRF5
MYADM
TMEM170B
ABHD15
OXR1
THEMIS
PUM3
WDTC1
ATF1
JDP2
STAG1
CUEDC1
ZNF592
SNHG8
IL2RA
GGT1
IL7
TULP2
LRRC37A2
ZC3H12A
MCTS1
SYCE1L
TOR3A
SLC6A15
DDA1
TSPAN13
UNC5C
PPBP
EGR3
RPN1
RALGPS1
ADNP2
RABIF
RALY
AFTPH
GUCY1A1
COMMD3
ATF4
FZR1
PTPRCAP
ITPR2
TRIM8
MYO9A
CTPS1
EZH1
MAT2A
ART5
PARP8
TNFAIP3
SMCO3
KLHL12
CNOT11
PAX7
LGALS1
FAM102A
GJA1
LAMTOR5
DUSP6
GZMA
SCN7A
SHOX2
SPRY2
TNFAIP2
SCARB2
PI4K2A
IL6
FAM89B
INHBA
RGS19
PHAX
SLC30A10
HCK
CCRL2
PLEKHO1
HDGF
DYRK3
MRPL47
NDE1
WNK2
UBE2V1
AURKA
EZR
ACOXL
TSPYL1
SMCHD1
TOMM20
GLCE
METTL21A
MECP2
DOCK3
VRK2
TMEM229B
NOP16
TRIM45
RRAGC
VPS54
TOP2B
GAN
AK3
ST3GAL6
DLG5
DENND6B
NHP2
SBNO2
VPS35
SNAP29
TIMM17B
MRPL43
SLC35D2
PDSS2
ZC3H7B
POGLUT2
AGRN
SUSD1
TRMT6
RTN3
RAP1GDS1
NUDT17
MAP2
QPRT
EPRS1
MAP1LC3A
MEX3B
IGFLR1
ASAH2
HMG20A
PSMA3
HS1BP3
TNFRSF4
C9orf78
DNAJC10
TSPOAP1
PKD1P6
ZFAND6
ITIH3
ADGRE5
SFT2D1
DYRK1A
RGMA
SEPTIN9
IFNG
MRPL42
ULBP2
ZFAND1
GNA12
ALKBH8
NAGA
PABPC3
MICB
TOLLIP
ZPBP
UBQLN4
ABCD2
PAK2
FADS6
PYCR1
CFAP70
NDUFA10
BZW2
HSBP1L1
MCMBP
ZNF652
METTL23
SFN
RPAP1
YIPF6
TRAM2
GON4L
FAM118A
BIRC3
WBP11
EYA3
ARL5A
ALOX15
SQOR
KLHL9
TRIB2
CCL7
PHOSPHO2
ARHGEF3
C17orf58
TNRC6B
MIPEP
RNF149
GNPDA2
TMEM26
BFSP2-AS1
CYSLTR1
KLHL10
TRMT61B
TMED9
TOE1
IL10RB-DT
RBCK1
SPRYD3
HAUS1
HCAR3
XBP1
WDFY1
IMPDH2
SLC29A3
CEMIP2
BMP7
ZMAT1
SLC5A1
POLL
SLC25A53
ATP5MG
BTBD11
GALNT10
RAB35
ZDHHC14
RPL3
RTKN2
ATL2
RRBP1
APBA3
CTSV
INPP5E
HEY1
ASIC1
CPNE3
AANAT
ZSCAN12
ABCD4
NSUN5
ZNF664
SDHAF3
SLC39A3
TMEM72
MTMR3
SEC11A
ATP2A2
SNX1
RBM33
ITK
GRAMD4
MFSD11
EIF2AK1
SLC25A24
DLX2
PRND
SERPINB9
PTGS1
SGCB
MBOAT1
TAS1R1
SAA4
ATP6V0D1
MAP3K3
KIAA1958
TIMM8B
H2AZ1
EXTL2
VEGFA
PDE4D
KCNE5
ABHD14B
ZNF195
NAB1
SPTAN1
INTS9
KHDRBS2
RNMT
EPCAM
SOX14
ARPP21
MX1
KCNJ16
PFDN1
CMC2
DPM3
ATP5MC1
OSMR
SPG21
BEX4
DHRS1
TYRO3
METTL1
SLC1A5
SLC16A5
RGS1
PDK1
SMPDL3B
TMEM163
NEDD4L
SOAT2
RPL23A
TRPM3
RPS3
DPYSL4
ITGAX
ARHGEF12
AIP
AGTR2
ADAMTS19
ARF6
USP14
RPS8
IKZF1
PLEKHG2
ATAD1
WNT1
EYA4
MZB1
LRCH4
ATG2A
IFIH1
UBXN4
HBP1
ICOS
LRRC1
SYCP1
MOS
BGN
EPN3
SRCAP
CES4A
CARHSP1
DCUN1D2
PLCG1
KCNT2
CEPT1
ACTN1
BCKDK
AS3MT
CISD3
GDPD1
TMEM63C
CELF2
ANKRD28
CCDC88A
ACOT8
SIPA1L3
MTOR
SPIC
SMAD7
FAM241A
SBF2
BNIP2
HELLS
OGFRL1
TSR1
TNKS2
FAM162A
SLC22A23
BCAT1
ATXN2L
ISG20
PTPRC
NRIP1
HSPA1A
ARHGDIA
IL1RL1
GSTM5
TREM1
ARHGAP39
HEMGN
PRELID1
NMD3
TALDO1
STXBP4
SSU72
CAPN7
TUBB2A
RAB5B
RAB5C
ZEB2
RLF
REEP2
SLC45A2
TRMT5
ARAP1
LRIG2
MAPK8
RCCD1
TOX
DENND1A
FYN
GAL3ST4
TMEM201
DNAJC1
ZNF726
MYO5A
LRRC46
ASB4
AP2A1
KCNK6
LAMB3
CHRNA5
SPNS2
PANK1
PIK3CD
TOP2A
LEF1
PLEK
PYROXD1
PRKCSH
CIZ1
RGS14
CTTN
MIF
RAMP3
ZNHIT1
SNHG7
MAFG
S1PR4
DENND4C
EFR3A
OTUD7B
LRRC8A
LRRC75B
CHST11
HK2
SEPTIN4
CSNK1D
ARSI
SH2D5
PHF8
GLIPR1L1
YTHDC2
IRAK1
CNOT3
CACNA1A
HAT1
RAB37
AKAP10
FUBP1
QPCT
STARD5
MOB2
MARS1
FAM98B
TBC1D9B
DNAJA3
CTSB
LAYN
PRUNE1
SLC16A6
SEMA4B
CLEC7A
PDGFC
[truncated: 18,837 more rows]
